# Supplementary material for: Reconciling Apparent Conflicts between Mitochondrial and Nuclear Phylogenies in African Elephants
Source: PLOS journal article supplement (doi:10.1371/journal.pone.0020642), 2011-06-08
Supplement: S1 (10.1371/journal.pone.0020642.s001) [file journal.pone.0020642.s001]

(B) Identification *within* the mtDNA CytB network of Johnson and colleagues (2007) of the elephant sequences of Debruyne (2005), showing the clade and sub-clade assignments previously determined by Debruyne

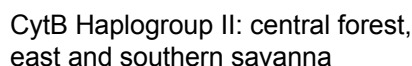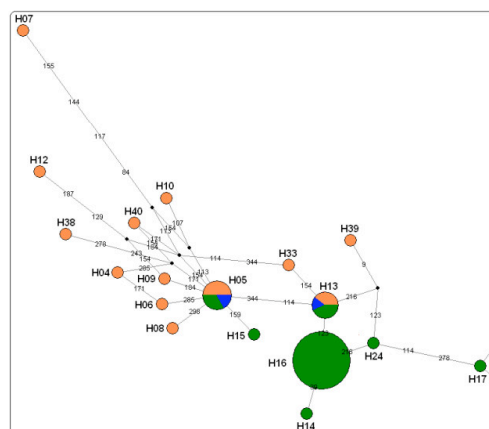

(A) The *three* African elephant “taxonomic” groups proposed by Johnson and colleagues (2007) based on mtDNA CytB

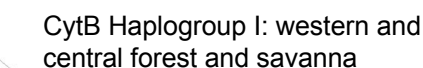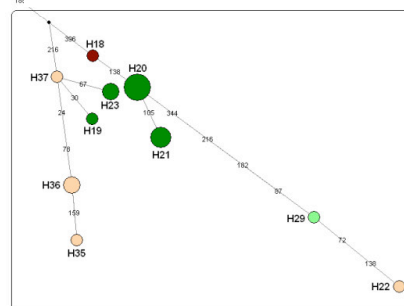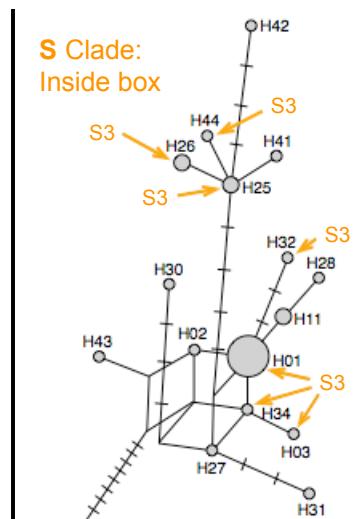

**F Clade:**  
All haplotypes outside box

(C) Names  
given to **F**  
and **S**  
mtDNA  
clades

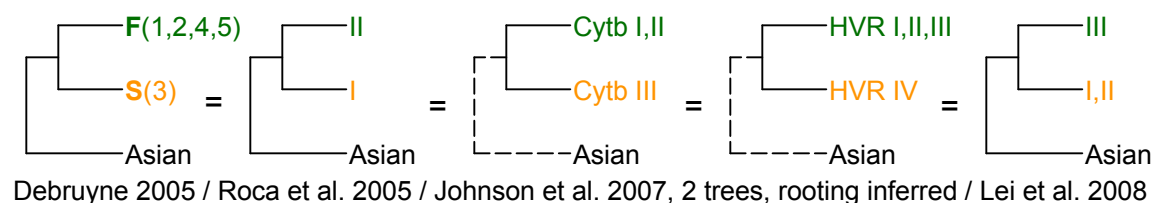

Figure S1
