# Supplementary material for: Reconciling Apparent Conflicts between Mitochondrial and Nuclear Phylogenies in African Elephants
Source: PLOS journal article supplement (doi:10.1371/journal.pone.0020642), 2011-06-08
Supplement: S3 (10.1371/journal.pone.0020642.s003) [file journal.pone.0020642.s003]

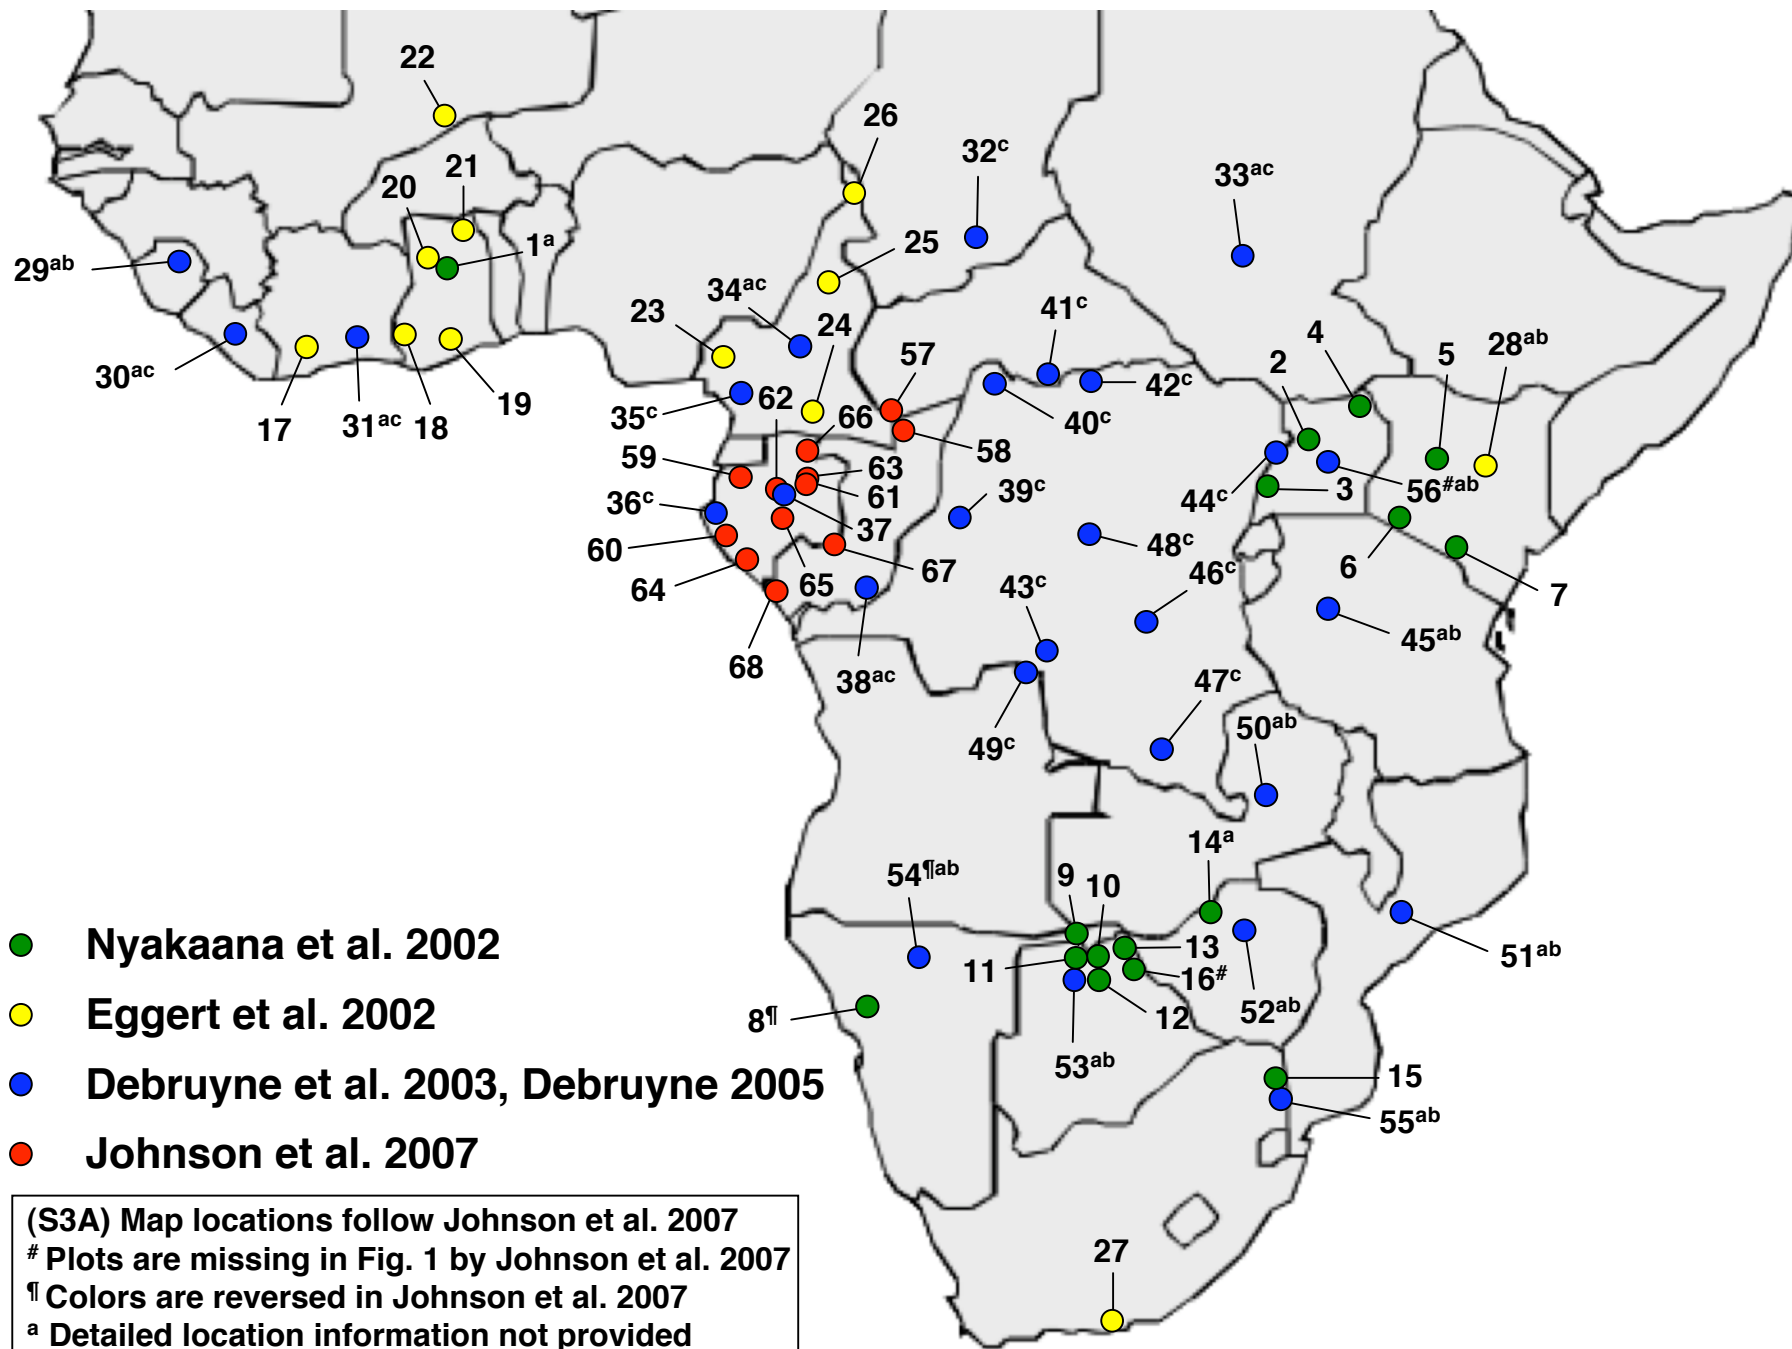

Figure S3 (B): List of sample locations on map.

| No.                                        | Country                   | Location                       | Sample origin |
|--------------------------------------------|---------------------------|--------------------------------|---------------|
| <u>Nyakaana et al. 2002</u>                |                           |                                |               |
| 1                                          | Ghana                     |                                | Wild          |
| 2                                          | Uganda                    | Murchison Falls NP             | Wild          |
| 3                                          | Uganda                    | Queen Elizabeth NP             | Wild          |
| 4                                          | Uganda                    | Kidepo Valley NP               | Wild          |
| 5                                          | Kenya                     | Samburu GR                     | Wild          |
| 6                                          | Kenya                     | Masai Mara NR                  | Wild          |
| 7                                          | Kenya                     | Amboseli NP                    | Wild          |
| 8*¶                                        | Namibia                   | Khorixas                       | Wild          |
| 9*                                         | Namibia                   | Caprivi NP                     | Wild          |
| 10*                                        | Botswana                  | Chobe NP                       | Wild          |
| 11*                                        | Botswana                  | Kwando                         | Wild          |
| 12*                                        | Botswana                  | Nunga Valley                   | Wild          |
| 13*                                        | Botswana                  | Sibuyu FR                      | Wild          |
| 14*                                        | Zimbabwe                  |                                | Wild          |
| 15*                                        | South Africa              | Kruger NP                      | Wild          |
| 16*#                                       | Botswana                  | Ngwasha                        | Wild          |
| <u>Eggert et al. 2002</u>                  |                           |                                |               |
| 17                                         | Côte d'Ivoire             | Tai NP                         | Wild          |
| 18                                         | Ghana                     | Bia NP                         | Wild          |
| 19                                         | Ghana                     | Kakum NP                       | Wild          |
| 20                                         | Ghana                     | Mole NP                        | Wild          |
| 21                                         | Ghana                     | Red Volta Valley               | Wild          |
| 22                                         | Mali                      | Gourma Region                  | Wild          |
| 23                                         | Cameroon                  | Banyang Mbo Wildlife Sanctuary | Wild          |
| 24                                         | Cameroon                  | Dja FR                         | Wild          |
| 25                                         | Cameroon                  | Benoue NP                      | Wild          |
| 26                                         | Cameroon                  | Waza NP                        | Wild          |
| 27                                         | South Africa              | Addo Elephant NP               | Wild          |
| 28                                         | Kenya                     |                                | Zoo           |
| <u>Debruyne et al. 2003, Debruyne 2005</u> |                           |                                |               |
| 29^                                        | Sierra Leone              |                                | Zoo           |
| 30                                         | Liberia                   |                                | Museum        |
| 31                                         | Côte d'Ivoire             |                                | Museum        |
| 32                                         | Chad                      | Zakouma NP                     | Museum        |
| 33                                         | Sudan (ex-southern Egypt) |                                | Museum        |
| 34                                         | Cameroon                  |                                | Museum        |
| 35                                         | Cameroon                  | Yambong                        | Museum        |
| 36                                         | Gabon                     | Coast near Alooombé            | Museum        |
| 37                                         | Gabon                     | Lope National Park             | Wild          |
| 38                                         | RC                        |                                | Museum        |
| 39                                         | DRC                       | Mai-Ndome Lake                 | Museum        |
| 40                                         | DRC                       | Bosobolo                       | Museum        |
| 41                                         | CAR                       | Ubangi River                   | Museum        |
| 42                                         | DRC                       | Uele n' Dungu                  | Museum        |
| 43                                         | DRC                       | Kamemba                        | Museum        |
| 44                                         | DRC                       | Kanyatsi                       | Museum        |
| 45                                         | Tanzania                  |                                | Zoo           |
| 46                                         | DRC                       | Panga Na Bodio                 | Museum        |
| 47                                         | DRC                       | Katanga                        | Museum        |
| 48                                         | DRC                       | Moma                           | Museum        |
| 49                                         | Angola                    | Luiza (DRC frontier)           | Museum        |
| 50                                         | Zambia                    |                                | Zoo           |
| 51                                         | Mozambique                |                                | Zoo           |
| 52                                         | Zimbabwe                  |                                | Zoo           |
| 53                                         | Botswana                  |                                | Zoo           |
| 54¶                                        | Namibia                   |                                | Zoo           |
| 55                                         | South Africa              |                                | Zoo           |
| 56#                                        | Uganda                    |                                | Zoo           |
| <u>Johnson et al. 2007†</u>                |                           |                                |               |
| 57                                         | CAR                       | Dzanga-Sangha NP               | Wild          |
| 58                                         | RC                        | Noubalé-Ndoki NP               | Wild          |

|    |       |                    |      |
|----|-------|--------------------|------|
| 59 | Gabon | Monts de Cristal   | Wild |
| 60 | Gabon | Iguéla NP          | Wild |
| 61 | Gabon | Ivindo NP          | Wild |
| 62 | Gabon | Lope NP            | Wild |
| 63 | Gabon | Ipassa Reserve     | Wild |
| 64 | Gabon | Loango/Mayumba NP  | Wild |
| 65 | Gabon | Massif de Chaillu  | Wild |
| 66 | Gabon | Minkébé NP         | Wild |
| 67 | Gabon | Plateaux Batéké NP | Wild |
| 68 | Gabon | Conkouati-Douli NP | Wild |

#### Roca et al. 2005

Locales 69-81 (not numbered on the map of Johnson and colleagues)

The F and S clades were identified for this dataset. Locations are identified in Figure 1 of the main text, and were not added to the map derived from Johnson and colleagues (2007), reproduced above. For locales also sampled by others, the results of Roca and colleagues (2005) are consistent in terms of presence or absence of S clade mtDNA. Locations not sampled by others are listed here:

|          |             |      |
|----------|-------------|------|
| Botswana | Mashatu     | Wild |
| Botswana | Savuti      | Wild |
| DRC      | Bili Forest | Wild |
| DRC      | Garamba     | Wild |
| Kenya    | Aberdares   | Wild |
| Kenya    | Mount Kenya | Wild |
| RC       | Odzala      | Wild |
| Tanzania | Ngorongoro  | Wild |
| Tanzania | Serengeti   | Wild |
| Tanzania | Tarangire   | Wild |
| Zimbabwe | Hwange      | Wild |
| Zimbabwe | Sengwa      | Wild |
| Zimbabwe | Zambezi     | Wild |

#### Lei et al., 2008

The F and S clades were identified for this dataset. Lei and colleagues used elephants from North American zoos, all of which are savanna elephants. They often can be assigned to a country but not a more precise location, and are almost all from countries in which wild elephants have been heavily genotyped for mtDNA. No additional locales were added to the map based on this study. However, where Johnson and colleagues (2007) had placed an icon on the map for zoo elephants, results were updated with the the additional data of Lei and colleagues (2008). This led to one update, at "locale" 28, where the presence of S clade is recorded for zoo elephants from Kenya.

#### Abbreviations

CAR (Central Africal Republic)  
DRC (Democratic Republic of the Congo)  
RC (Republic of the Congo)  
NP (National Park)  
NR (National reserve)  
FR (Forest reserve)

#### Notes

\*: Detailed locations follow Eggert et al. 2002.  
#: Plots are missing in Fig. 1 by Johnson et al. 2007.  
¶: Locations 8 and 54 have colors reversed in Fig.1 of Johnson et al. 2007.  
† Locations and countries were not clearly indicated by Johnson et al. 2007.  
^ Original GenBank data is from Barriel et al. 1999.
